# Supplementary material for: Implicit Memory and Anesthesia: A Systematic Review and Meta-Analysis
Source: MDPI journal article supplement (doi:10.3390/life11080850), 2021-08-19
Supplement: s1 [file s1]

**Table S1.** Characteristic of considered trials.

| Study                      | Type of Surgery                                     | Type of Anaesthesia | Anaesthetic Regimen                 | Pre-medication | Light Anaesthesia | Light Analgesia | AB M | NMBA | Anaesthesia >60 min | Patient's (N) | Test adopted | Surgical Stimulation during Word presentation | Words Presented Throughout Anaesthesia | Implicit Memory |
|----------------------------|-----------------------------------------------------|---------------------|-------------------------------------|----------------|-------------------|-----------------|------|------|---------------------|---------------|--------------|-----------------------------------------------|----------------------------------------|-----------------|
| Millar and Watkinson, 1983 | Gynaecological - General                            | General             | Induction: IV<br>Maintenance: IA    | Yes/No         | Yes               | Yes             | No   | Yes  | Nd                  | 27            | WRT          | Yes                                           | No                                     | Yes             |
| Jelicic et al., 1990       | Nd                                                  | General             | Induction: IV<br>Maintenance: IA    | Nd             | Yes               | No              | No   | Yes  | Nd                  | 25            | FAT          | Yes                                           | No                                     | Yes             |
| Kihlstrom et al., 1990     | Gynaecological - Orthopaedic - Abdominal - Vascular | General             | Induction: IV<br>Maintenance: IA    | No             | No                | Yes             | No   | Yes  | Yes                 | 25            | WRT - FAT    | Yes                                           | Yes                                    | Yes             |
| Block et al., 1991         | Gynaecological - General                            | General             | Induction: IV<br>Maintenance: IA    | No             | Yes/No            | Yes/No          | No   | Yes  | Yes                 | 56            | WSC - WRT    | Yes                                           | Yes/No                                 | Yes             |
| Bethune et al., 1992       | Cardiac -                                           | General             | Induction: IV<br>Maintenance: IV    | No             | Yes               | No              | No   | Yes  | Yes                 | 19            | FAT          | Yes                                           | Yes                                    | Yes/No          |
| Brown et al., 1992         | Ophthalmic                                          | General             | Induction: IV<br>Maintenance: IA    | No             | No                | No              | No   | Yes  | Nd                  | 10            | CG - SGT     | No                                            | No                                     | Yes             |
| Dwyer et al., 1992         | General                                             | General             | Induction: IV<br>Maintenance: IA    | No             | No                | Yes             | No   | Yes  | Yes                 | 90            | GK           | Yes/No                                        | No                                     | No              |
| Jelicic et al., 1992a      | Ophthalmic                                          | General             | Induction: IV<br>Maintenance: IA    | No             | Yes               | No              | No   | Yes  | Nd                  | 43            | GK           | Yes                                           | No                                     | Yes             |
| Jelicic et al., 1992b      | Nd                                                  | General             | Induction: IV<br>Maintenance: IA    | Nd             | Yes               | No              | No   | Yes  | Nd                  | 25            | CG           | Yes                                           | No                                     | Yes             |
| Cork et al., 1992          | Nd                                                  | General             | Induction: IV<br>Maintenance: IA    | No             | Yes               | No              | No   | Yes  | Yes                 | 25            | FAT - WR     | Yes                                           | Yes                                    | No              |
| Bonebakker et al., 1993    | Elective                                            | General             | Induction: IV<br>Maintenance: IA    | No             | No                | No              | No   | Yes  | Nd                  | 81            | CG           | Yes                                           | No                                     | No              |
| Jelicic et al., 1993       | Body surface                                        | General             | Induction: IV<br>Maintenance: IA    | No             | No                | Yes             | No   | No   | Nd                  | 41            | GK           | Yes                                           | No                                     | No              |
| Munglani et al., 1993      | Volunteers                                          | Sedation            | Induction: IA<br>Maintenance: IA    | No             | Yes               | Yes             | No   | No   | Nd                  | 9             | FCR          | No                                            | No                                     | No              |
| Westmoreland et al., 1993  | Nd                                                  | General             | Induction: IV<br>Maintenance: IA    | Yes/No         | No                | No              | No   | Yes  | Nd                  | 96            | FAT - CG     | Yes                                           | Yes                                    | No              |
| Parker et al., 1994        | Minor or intermediate                               | General             | Induction: IV<br>Maintenance: IA    | Yes            | Yes               | Yes             | No   | Yes  | Yes                 | 24            | FAT          | Yes                                           | No                                     | No              |
| Schwender et al., 1994     | Cardiac                                             | General             | Induction: IV<br>Maintenance: IA/IV | Yes            | Yes/No            | Yes             | No   | Yes  | Yes                 | 30            | FAT          | Yes                                           | No                                     | Yes             |
| De Roode et al., 1995      | Ophthalmic                                          | General             | Induction: IV<br>Maintenance: IA/IV | Yes            | Yes               | Yes             | No   | Yes  | Nd                  | 83            | GK - FCR     | Yes                                           | No                                     | No              |
| Gonsowski et al., 1995     | Volunteers                                          | General             | Induction: IV<br>Maintenance: IA    | No             | Yes               | Yes             | No   | Yes  | Yes                 | 12            | FAT - GK     | No                                            | No                                     | No              |
| Van Hooff et al., 1995     | Cardiac                                             | General             | Induction: IV<br>Maintenance: IV    | Yes/No         | No                | No              | No   | Yes  | Yes                 | 9             | CG - WRT     | Yes                                           | No                                     | Yes             |
| Bonebakker et al., 1996    | Gynecological - General - Plastic -                 | General             | Induction: IV<br>Maintenance: IA    | No             | No                | No              | No   | Yes  | Nd                  | 489           | WSC - FCR    | Yes                                           | No                                     | Yes/No          |

|                            |                                             |          |                                     |     |        |        |     |     |     |     |              |     |     |        |
|----------------------------|---------------------------------------------|----------|-------------------------------------|-----|--------|--------|-----|-----|-----|-----|--------------|-----|-----|--------|
| Orthopaedic - Traumatology |                                             |          |                                     |     |        |        |     |     |     |     |              |     |     |        |
| Donker et al., 1996        | Orthopedic                                  | General  | Induction: IV<br>Maintenance: IV    | No  | Yes    | No     | No  | Yes | No  | 58  | GK           | Yes | No  | No     |
| Russell and Wang, 1997     | Major - Gynaecologic al                     | General  | Induction: IV<br>Maintenance: IA    | Yes | No     | Yes    | No  | Yes | No  | 38  | CG - FAT     | Yes | Yes | No     |
| Struys et al., 1998        | Gynaecologic al                             | Sedation | Induction: IV<br>Maintenance: IV    | No  | No     | Yes    | Yes | No  | No  | 58  | FAT          | Yes | No  | No     |
| Münt e et al., 1999        | Vertebral                                   | General  | Induction: IV<br>Maintenance: IA+IV | Yes | No     | No     | No  | Yes | Yes | 60  | WSC - FFJ    | Yes | No  | Yes/No |
| Lubke et al., 1999         | Orthopaedic - Traumatology                  | General  | Induction: IV<br>Maintenance: IA    | No  | No     | No     | Yes | Yes | Yes | 96  | WSC with PDP | Yes | No  | Yes    |
| De Roode et al., 2000      | Volunteers                                  | Sedation | Induction: IV<br>Maintenance: IV    | No  | Yes/No | Yes    | No  | No  | Yes | 20  | WSC          | No  | No  | No     |
| Ghoneim et al., 2000       | Gynaecologic-Orthopedic - General - Plastic | General  | Induction: IV<br>Maintenance: IA    | No  | No     | Yes/No | No  | Yes | Yes | 179 | FAT          | Yes | Yes | Yes/No |
| Lubke et al., 2000         | Caesarean section                           | General  | Induction: IV<br>Maintenance: IA    | No  | No     | Yes    | Yes | Yes | No  | 24  | WSC with PDP | Yes | No  | Yes    |
| Münt e et al., 2000        | Vertebral                                   | General  | Induction: IV<br>Maintenance: IA    | Yes | No     | No     | No  | Yes | Yes | 30  | FFJ          | Yes | No  | No     |
| Stapleton et al., 2000     | Minor - gynaecologica l                     | Sedation | Induction: IV<br>Maintenance: IV    | No  | Yes    | Yes    | No  | No  | No  | 32  | WSC with PDP | Yes | No  | No     |
| Renna et al., 2000         | Minor - gynaecologica l                     | Sedation | Induction: IA<br>Maintenance: IA    | No  | Yes    | Yes    | Yes | No  | Nd  | 47  | WRT          | No  | No  | Yes/No |
| Andrade et al., 2001       | Laparoscopic ?                              | General  | Induction: IA<br>Maintenance: IA+IV | No  | No     | Yes    | Yes | Yes | Nd  | 24  | CG           | No  | No  | No     |
| Gidron et al., 2002        | Laparoscopic cholecystecto my               | General  | Induction: IV<br>Maintenance: IA    | No  | No     | No     | No  | Yes | Nd  | 30  | FAT          | Yes | Nd  | Yes    |
| Münt e et al., 2001        | ICD implantation                            | General  | Induction: IV<br>Maintenance: IV    | Yes | Yes    | No     | No  | Yes | Yes | 30  | FFJ          | Yes | No  | No     |
| Kerssens et al., 2001      | Orthopaedic - General - Urologic            | General  | Induction: IV<br>Maintenance: IV    | No  | No     | Yes    | Yes | Yes | No  | 41  | WRT - CG     | Yes | No  | No     |
| Loveman et al., 2001       | Cardiac                                     | General  | Induction: IV<br>Maintenance: IV    | Yes | Yes    | Yes    | No  | Yes | No  | 14  | WSC - FCR    | No  | Nd  | No     |
| Russell and Wang, 2001     | Major - gynaecologica l                     | General  | Induction: IV<br>Maintenance: IV    | Yes | No     | No     | No  | Yes | Yes | 40  | CG - WRT     | Yes | Yes | No     |
| Münt e et al., 2002        | Vertebral                                   | General  | Induction: IV<br>Maintenance: IA+IV | Yes | No     | No     | No  | Yes | Yes | 60  | WRT - FFJ    | Yes | No  | No     |
| Kerssens et al., 2002      | General – Orthopaedic - Plastic             | General  | Induction: IV<br>Maintenance: IV    | No  | Yes    | Yes    | Yes | Yes | Yes | 56  | WSC with PDP | No  | Nd  | Yes    |
| Lequeux et al., 2003       | Minor general surgery                       | General  | Induction: IV<br>Maintenance: IV    | No  | No     | Yes    | No  | Yes | Yes | 20  | WSC - FCR    | No  |     | No     |

|                          |                                                    |          |                                     |        |     |     |     |        |     |     |              |        |        |        |
|--------------------------|----------------------------------------------------|----------|-------------------------------------|--------|-----|-----|-----|--------|-----|-----|--------------|--------|--------|--------|
| Münthe et al., 2003      | Laparoscopic inguinal herniotomy                   | General  | Induction: IV<br>Maintenance: IV    | No     | No  | No  | Yes | Yes    | Yes | 128 | FFJ          | Yes/No | Yes/No | Yes/No |
| Deepprose et al., 2005   | Orthopaedic                                        | General  | Induction: IV<br>Maintenance: IA    | No     | No  | Yes | Yes | No     | No  | 126 | WSC          | Yes/No | No     | Yes    |
| Lequeux et al., 2005     | Minor                                              | Sedation | Induction: IV<br>Maintenance: IV    | No     | Yes | No  | Yes | No     | Nd  | 10  | WSC - FCR    | No     | Nd     | No     |
| Kerssens et al., 2005    | Orthopaedic - General                              | General  | Induction: IV<br>Maintenance: IA+IV | No     | No  | No  | Yes | Yes    | Yes | 90  | WSC with PDP | Yes    | No     | No     |
| Stonell et al., 2006     | Nd                                                 | General  | Induction: IV<br>Maintenance: IA    | No     | No  | Yes | Yes | Yes    | Yes | 113 | WSC with PDP | Yes    | Nd     | Yes    |
| Wang et al., 2006        | Lower limb                                         | Sedation | Induction: IV<br>Maintenance: IV    | Nd     | Yes | No  | Yes | No     | Nd  | 12  | WSC with PDP | Yes    | Nd     | No     |
| Dobrunz et al., 2007     | Gynaecological                                     | General  | Induction: IV<br>Maintenance: IA    | Yes/No | No  | No  | Yes | Yes    | Yes | 120 | WRT - WSC    | Yes/No | No     | Yes/No |
| Bejjani et al., 2009     | Cardiac                                            | General  | Induction: IV<br>Maintenance: IV    | Yes    | No  | No  | Yes | Yes    | Yes | 38  | WSC          | Yes    | No     | No     |
| Hadzidiakos et al., 2009 | Urological – Gynaecological – General - Orthopedic | General  | Induction: IV<br>Maintenance: IV    | Yes    | No  | No  | Yes | Yes    | Yes | 119 | WSC with PDP | Yes    | Yes    | No     |
| Kerssens et al., 2009    | Major - Orthopaedic                                | General  | Induction: IV<br>Maintenance: IA    | No     | No  | No  | Yes | Yes    | Yes | 109 | WRT          | Yes    | No     | Yes/No |
| Tian et al., 2010        | Volunteers                                         | Sedation | Induction: IV<br>Maintenance: IV    | No     | Yes | Yes | No  | No     | No  | 6   | WSC with PDP | No     | Nd     | No     |
| Ozcan et al., 2011       | Orthopaedic                                        | General  | Induction: IV<br>Maintenance: IA    | Yes    | No  | No  | Yes | Yes    | Yes | 37  | WSC          | Yes    | No     | No     |
| Liu et al., 2012         | Volunteers                                         | Sedation | Induction: IV<br>Maintenance: IV    | No     | No  | Yes | No  | No     | Nd  | 8   | FCR          | No     | Nd     | No     |
| Flouda et al., 2013      | Elective                                           | General  | Induction: IV<br>Maintenance: IA/IV | No     | Yes | No  | Yes | Yes    | Yes | 93  | WSC with PDP | Yes    | Yes    | Yes    |
| Quan et al., 2013        | Volunteers                                         | Sedation | Induction: IV<br>Maintenance: IV    | No     | Yes | Yes | Yes | No     | Yes | 12  | WSC with PDP | No     | Nd     | No     |
| Lequeux et al., 2014     | Nd                                                 | General  | Induction: IV<br>Maintenance: IV    | Yes    | No  | No  | Yes | Yes/No | Yes | 78  | WSC - FCR    | Yes    | Yes    | No     |
| Levantesi et al., 2016   | Major abdominal                                    | General  | Induction: IV<br>Maintenance: IA    | No     | No  | No  | Yes | Yes    | Nd  | 64  | FAT          | Yes    | No     | Yes/No |
| Elbadawy et al., 2015    | Orthopaedic                                        | General  | Induction: IV<br>Maintenance: IA/IV | No     | No  | Yes | Yes | Yes    | Yes | 400 | WRT          | Yes    | No     | No     |
| Xin-de Chen et al., 2018 | Orthopaedic                                        | General  | Induction: IV<br>Maintenance: IA/IV | No     | No  | Yes | Nd  | Yes    | Yes | 80  | WRT          | Yes    | No     | Yes    |
| Kallionpää et al., 2018  | Volunteers                                         | Sedation | Induction: IV<br>Maintenance: IV    | No     | Yes | Yes | No  | No     | No  | 47  | FFJ          | No     | Nd     | No     |
| Aceto et al., 2003       | Laparoscopic cholecystectomy                       | General  | Induction: IV<br>Maintenance: IA    | No     | No  | No  | No  | Yes    | Yes | 40  | FAT          | Yes    | No     | No     |

Psychological tests for implicit memory detecting: category generation (CG), sentence generation task (SGT), free association test (FAT), word stem completion test (WSC), word recognition test (WRT), general knowledge (GK), forced-choice recognition (FCR), preference, familiarity fame judgements (FFJ), process dissociation procedure (PDP). NMBA: neuromuscular blocking agent; ICD: implantable cardioverter Defibrillator; IV: Intravenous Anaesthesia; IA: Inhalational Anaesthesia.

**Table S2.** Distribution of cohorts among the considered variables during only general anaesthesia regimens.

ASA: American Society of Anesthesiologist physical status classification; NMBA:

| Variable                               | Implicit Memory |    |      |        |        |         |
|----------------------------------------|-----------------|----|------|--------|--------|---------|
|                                        | Yes             | No | OR   | L95%CI | U95%CI | P-value |
| <b>Age</b>                             |                 |    |      |        |        |         |
| ≤ 50 years                             | 31              | 44 |      |        |        |         |
| > 50 years                             | 11              | 10 | 1.61 | 0.61   | 4.27   | 0.47    |
| <b>ASA</b>                             |                 |    |      |        |        |         |
| I-II                                   | 23              | 44 |      |        |        |         |
| III-IV                                 | 10              | 7  | 2.73 | 0.92   | 8.13   | 0.12    |
| <b>Duration</b>                        |                 |    |      |        |        |         |
| ≤ 60 minutes                           | 4               | 9  |      |        |        |         |
| > 60 minutes                           | 25              | 37 | 1.52 | 0.42   | 5.48   | 0.74    |
| <b>Premedication</b>                   |                 |    |      |        |        |         |
| No benzodiazepines                     | 33              | 38 |      |        |        |         |
| Benzodiazepines                        | 7               | 23 | 0.35 | 0.13   | 0.92   | 0.05    |
| <b>Induction</b>                       |                 |    |      |        |        |         |
| No benzodiazepines                     | 39              | 57 |      |        |        |         |
| Benzodiazepines                        | 3               | 4  | 1.10 | 0.15   | 6.87   | 1.0     |
| <b>Maintenance</b>                     |                 |    |      |        |        |         |
| Intravenous                            | 28              | 38 |      |        |        |         |
| Inhalational                           | 14              | 22 | 1.13 | 0.49   | 2.58   | 0.94    |
| No N <sub>2</sub> O during maintenance | 20              | 31 |      |        |        |         |
| N <sub>2</sub> O during maintenance    | 22              | 30 | 1.14 | 0.52   | 2.50   | 0.91    |
| No benzodiazepines                     | 41              | 61 |      |        |        |         |
| Benzodiazepines                        | 1               | 0  | inf  | 0.03   | inf    | 0.41    |
| No opioids                             | 5               | 10 |      |        |        |         |
| Opioids                                | 37              | 51 | 1.45 | 0.46   | 4.60   | 0.73    |
| No NMBA                                | 3               | 3  |      |        |        |         |
| NMBA                                   | 39              | 58 | 0.68 | 0.27   | 1.79   | 0.69    |
| No light anaesthetic regimen           | 29              | 49 |      |        |        |         |
| Light anaesthetic regimen              | 13              | 12 | 1.83 | 0.74   | 4.54   | 1.0     |
| No deep anaesthetic regimen            | 13              | 13 |      |        |        |         |
| Deep anaesthetic regimen               | 29              | 48 | 0.60 | 0.25   | 1.48   | 0.38    |
| No light analgesic regimen             | 25              | 39 |      |        |        |         |
| Light analgesic regimen                | 17              | 22 | 1.21 | 0.54   | 2.70   | 0.81    |
| No deep analgesic regimen              | 17              | 24 |      |        |        |         |
| Deep analgesic regimen                 | 25              | 37 | 0.95 | 0.43   | 2.13   | 1.0     |
| <b>Monitoring</b>                      |                 |    |      |        |        |         |
| No AMB-guided anaesthesia              | 35              | 44 |      |        |        |         |
| ABM-guided anaesthesia                 | 7               | 16 | 0.55 | 0.20   | 1.49   | 0.34    |
| <b>Listening to the auditory task</b>  |                 |    |      |        |        |         |
| No during surgical stimulation         | 4               | 8  |      |        |        |         |
| During surgical stimulation            | 38              | 53 | 1.43 | 0.35   | 6.97   | 0.76    |
| No during all the maintenance period   | 30              | 44 |      |        |        |         |
| During all the maintenance period      | 7               | 16 | 0.64 | 0.24   | 1.75   | 0.53    |
| <b>Timing of memory testing</b>        |                 |    |      |        |        |         |
| ≤ 24 hours                             | 30              | 41 |      |        |        |         |
| > 24 hours                             | 12              | 20 | 0.82 | 0.35   | 1.93   | 0.81    |

neuromuscular blocking agent; ABM: anaesthesia brain monitor; OR: odds ratio; L95%CI and U95%CI: lower limit and upper limit of the 95% confidence interval (CI).

**Table S3.** Distribution of cohorts among the considered variables during only inhalational general anaesthesia regimens.

| Variable                               | Implicit memory |    |      |        |        |             |
|----------------------------------------|-----------------|----|------|--------|--------|-------------|
|                                        | Yes             | No | OR   | L95%CI | U95%CI | P-value     |
| <b>Age</b>                             |                 |    |      |        |        |             |
| ≤ 50 years                             | 22              | 28 |      |        |        |             |
| > 50 years                             | 5               | 5  | 1.27 | 0.33   | 4.96   | 1.0         |
| <b>ASA</b>                             |                 |    |      |        |        |             |
| I-II                                   | 14              | 30 |      |        |        |             |
| III-IV                                 | 7               | 5  | 3.00 | 0.81   | 11.13  | 0.18        |
| <b>Duration</b>                        |                 |    |      |        |        |             |
| ≤ 60 minutes                           | 4               | 9  |      |        |        |             |
| > 60 minutes                           | 25              | 37 | 1.21 | 0.06   | 76.85  | 1.0         |
| <b>Premedication</b>                   |                 |    |      |        |        |             |
| No benzodiazepines                     | 23              | 26 |      |        |        |             |
| Benzodiazepines                        | 3               | 13 | 0.26 | 0.07   | 1.03   | <b>0.09</b> |
| <b>Induction</b>                       |                 |    |      |        |        |             |
| No benzodiazepines                     | 39              | 57 |      |        |        |             |
| Benzodiazepines                        | 3               | 1  | 0    | 0      | 54.28  | 1.0         |
| <b>Maintenance</b>                     |                 |    |      |        |        |             |
| No N <sub>2</sub> O during maintenance | 10              | 14 |      |        |        |             |
| N <sub>2</sub> O during maintenance    | 18              | 25 | 1.01 | 0.37   | 2.78   | 1.0         |
| No opioids                             | 4               | 7  |      |        |        |             |
| Opioids                                | 24              | 32 | 1.31 | 0.29   | 6.81   | 0.75        |
| No NMBA                                | 3               | 2  |      |        |        |             |
| NMBA                                   | 39              | 37 | inf  | 0.14   | inf    | 0.51        |
| No light anaesthetic regimen           | 29              | 32 |      |        |        |             |
| Light anaesthetic regimen              | 13              | 7  | 2.17 | 0.69   | 6.77   | 0.29        |
| No deep anaesthetic regimen            | 9               | 8  |      |        |        |             |
| Deep anaesthetic regimen               | 19              | 31 | 0.55 | 0.18   | 1.66   | 0.43        |
| No light analgesic regimen             | 25              | 39 |      |        |        |             |
| Light analgesic regimen                | 17              | 22 | 0.76 | 0.27   | 2.11   | 0.78        |
| No deep analgesic regimen              | 9               | 17 |      |        |        |             |
| Deep analgesic regimen                 | 19              | 22 | 0.63 | 0.59   | 4.50   | 0.49        |
| <b>Monitoring</b>                      |                 |    |      |        |        |             |
| No ABM monitoring                      | 19              | 30 |      |        |        |             |
| ABM monitoring                         | 7               | 9  | 1.23 | 0.39   | 3.85   | 0.95        |
| No AMB-guided anaesthesia              | 24              | 31 |      |        |        |             |
| AMB-guided anaesthesia                 | 4               | 8  | 0.65 | 0.17   | 2.40   | 0.74        |
| <b>Listening to the auditory task</b>  |                 |    |      |        |        |             |
| No during surgical stimulation         | 1               | 4  |      |        |        |             |
| During surgical stimulation            | 27              | 35 | 3.04 | 0.28   | 157.37 | 0.39        |
| No during all the maintenance period   | 21              | 29 |      |        |        |             |
| During all the maintenance period      | 5               | 10 | 0.69 | 0.21   | 2.32   | 0.76        |
| <b>Timing of memory testing</b>        |                 |    |      |        |        |             |
| ≤ 24 hours                             | 19              | 22 |      |        |        |             |
| > 24 hours                             | 9               | 17 | 0.61 | 0.22   | 1.69   | 0.49        |

ASA: American Society of Anesthesiologist physical status classification; NMBA: neuromuscular blocking agent; ABM: anaesthesia brain monitor; OR: odds ratio; L95%CI and U95%CI: lower limit and upper limit of the 95% confidence interval (CI).

**Table S4.** Distribution of cohorts among the considered variables during only intravenous general anaesthesia regimens.

| Variable                               | Implicit memory |    |      |        |        |         |
|----------------------------------------|-----------------|----|------|--------|--------|---------|
|                                        | Yes             | No | OR   | L95%CI | U95%CI | P-value |
| <b>Age</b>                             |                 |    |      |        |        |         |
| ≤50 years                              | 8               | 16 |      |        |        |         |
| >50 years                              | 6               | 5  | 2.40 | 0.56   | 10.32  | 0.41    |
| <b>ASA</b>                             |                 |    |      |        |        |         |
| I-II                                   | 9               | 14 |      |        |        |         |
| III-IV                                 | 3               | 2  | 2.33 | 0.32   | 16.82  | 0.72    |
| <b>Duration</b>                        |                 |    |      |        |        |         |
| ≤ 60 minutes                           | 3               | 7  |      |        |        |         |
| > 60 minutes                           | 11              | 14 | 1.80 | 0.31   | 13.35  | 0.70    |
| <b>Praemedication</b>                  |                 |    |      |        |        |         |
| No benzodiazepines                     | 10              | 12 |      |        |        |         |
| Benzodiazepines                        | 4               | 10 | 0.48 | 0.12   | 2.01   | 0.51    |
| <b>Induction</b>                       |                 |    |      |        |        |         |
| No benzodiazepines                     | 11              | 19 |      |        |        |         |
| Benzodiazepines                        | 3               | 3  | 1.70 | 0.19   | 15.04  | 0.66    |
| <b>Maintenance</b>                     |                 |    |      |        |        |         |
| No N <sub>2</sub> O during maintenance | 10              | 17 |      |        |        |         |
| N <sub>2</sub> O during maintenance    | 4               | 5  | 1.35 | 0.21   | 8.04   | 0.71    |
| No benzodiazepines                     | 13              | 1  |      |        |        |         |
| Benzodiazepines                        | 1               | 0  | inf  | 0.04   | inf    | 0.39    |
| No opioids                             | 1               | 3  |      |        |        |         |
| Opioids                                | 13              | 19 | 2.02 | 0.14   | 115.84 | 1.0     |
| No NMBA                                | 3               | 1  |      |        |        |         |
| NMBA                                   | 11              | 21 | 0.19 | 0.00   | 2.59   | 0.28    |
| No light anaesthetic regimen           | 29              | 32 |      |        |        |         |
| Light anaesthetic regimen              | 13              | 7  | 1.35 | 0.21   | 8.04   | 0.71    |
| No deep anaesthetic regimen            | 4               | 5  |      |        |        |         |
| Deep anaesthetic regimen               | 10              | 17 | 0.74 | 0.12   | 4.67   | 0.71    |
| No light analgesic regimen             | 6               | 15 |      |        |        |         |
| Light analgesic regimen                | 8               | 7  | 2.86 | 0.71   | 11.44  | 0.25    |
| No deep analgesic regimen              | 8               | 7  |      |        |        |         |
| Deep analgesic regimen                 | 6               | 15 | 0.35 | 0.09   | 1.40   | 0.25    |
| <b>Monitoring</b>                      |                 |    |      |        |        |         |
| No ABM monitoring                      | 5               | 10 |      |        |        |         |
| ABM monitoring                         | 7               | 12 | 1.16 | 0.28   | 4.84   | 1.0     |
| No AMB-guided anaesthesia              | 11              | 13 |      |        |        |         |
| AMB-guided anaesthesia                 | 3               | 8  | 0.45 | 0.06   | 2.52   | 0.46    |
| <b>Listening to the auditory task</b>  |                 |    |      |        |        |         |
| No during surgical stimulation         | 3               | 4  |      |        |        |         |
| During surgical stimulation            | 11              | 18 | 0.82 | 0.11   | 6.68   | 1.0     |
| No during all the maintenance period   | 9               | 15 |      |        |        |         |
| During all the maintenance period      | 2               | 6  | 0.57 | 0.05   | 4.14   | 0.68    |
| <b>Timing of memory testing</b>        |                 |    |      |        |        |         |
| ≤ 24 hours                             | 11              | 19 |      |        |        |         |
| > 24 hours                             | 3               | 3  | 1.70 | 0.19   | 15.04  | 0.66    |

ASA: American Society of Anesthesiologist physical status classification; NMBA: neuromuscular blocking agent; ABM: anaesthesia brain monitor; OR: odds ratio; L95%CI and U95%CI: lower limit and upper limit of the 95% confidence interval (CI).
